# Supplementary material for: Dendrimer facilitated synthesis of multifunctional lanthanide based hybrid nanomaterials for biological applications
Source: Royal Society of Chemistry journal article supplement (doi:10.1039/c2jm13899a), 2012-01-01
Supplement: c2jm13899a.pdf [file c2jm13899a.pdf]

## Electronic Supporting Information (ESI)

### Dendrimer Facilitated Synthesis of Multifunctional Lanthanide Based Hybrid Nanomaterials for Biological Applications

Meitram Niraj Luwang,<sup>a</sup> Sudeshna Chandra,<sup>b</sup> Dhirendra Bahadur<sup>b</sup>

and Sri Krishna Srivastava<sup>\*a</sup>

<sup>a</sup>*Department of Chemistry, Manipur University, Imphal-795003, India*

*e-mail: sksrivastava01@yahoo.co.in*

<sup>b</sup>*Department of Metallurgical Engineering and Materials Science,*

*Indian Institute of Technology Bombay, Powai, Mumbai-400076, India*

#### Figure caption:

**Fig. S1** EDX spectra of  $\text{YPO}_4\text{:Tb}^{3+}\text{@Fe}_3\text{O}_4$ .

**Fig S2** M-T loop of  $\text{Fe}_3\text{O}_4\text{:Na-citrate}$  (1:2).

**Fig S3** TGA curve of  $\text{Fe}_3\text{O}_4$ ,  $\text{Fe}_3\text{O}_4\text{:Na-citrate}$  and hybrid material,  $\text{YPO}_4\text{:Tb}^{3+}\text{@Fe}_3\text{O}_4$ .

**Fig. S4** SEM images of  $\text{YPO}_4\text{:Tb}^{3+}\text{@Fe}_3\text{O}_4$  in presence of dendrimer (a) lower and (b) higher magnification.

**Fig. S5** Excitation spectra of the  $\text{YPO}_4\text{:Tb}^{3+}$  when monitored at emission wavelength of 545 nm.

**Fig. S6** Viabilities of HeLa cells incubated with (a) sodium citrate stabilized  $\text{Fe}_3\text{O}_4$ , (b)  $\text{YPO}_4\text{:Tb}^{3+}$ , (c) PAMAM dendrimer, (d)  $\text{YPO}_4\text{:Tb}^{3+}$  with dendrimer and (e) nanohybrid  $\text{YPO}_4\text{:Tb}^{3+}\text{@Fe}_3\text{O}_4$ .

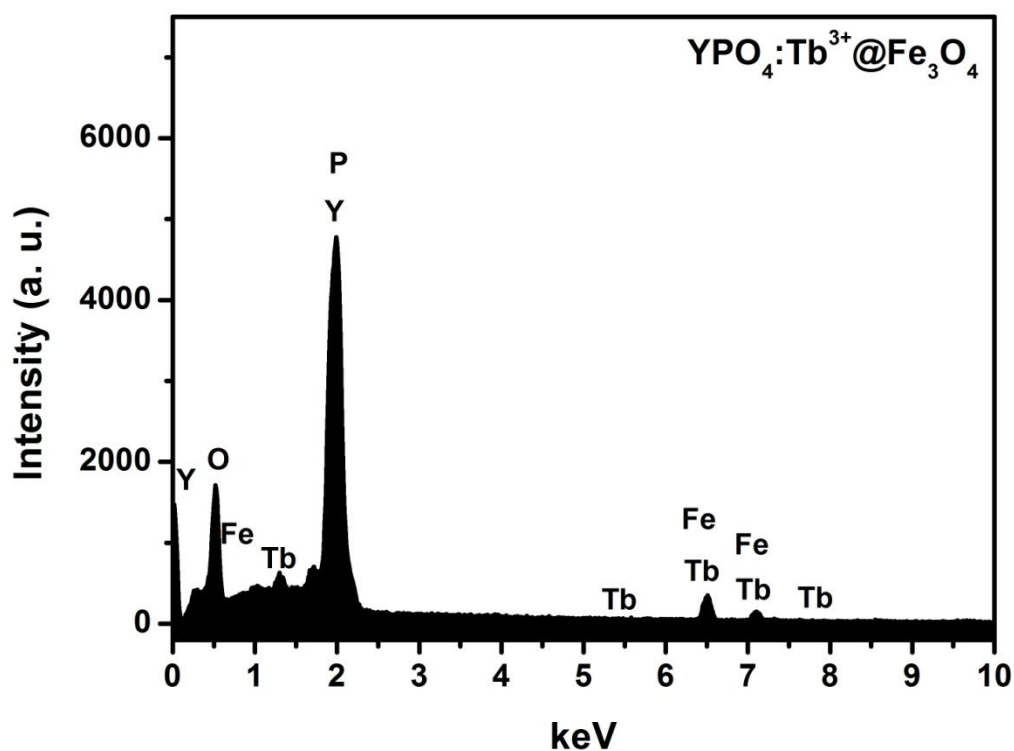

Fig. S1 EDX spectra of  $\text{YPO}_4:\text{Tb}^{3+}@\text{Fe}_3\text{O}_4$ .

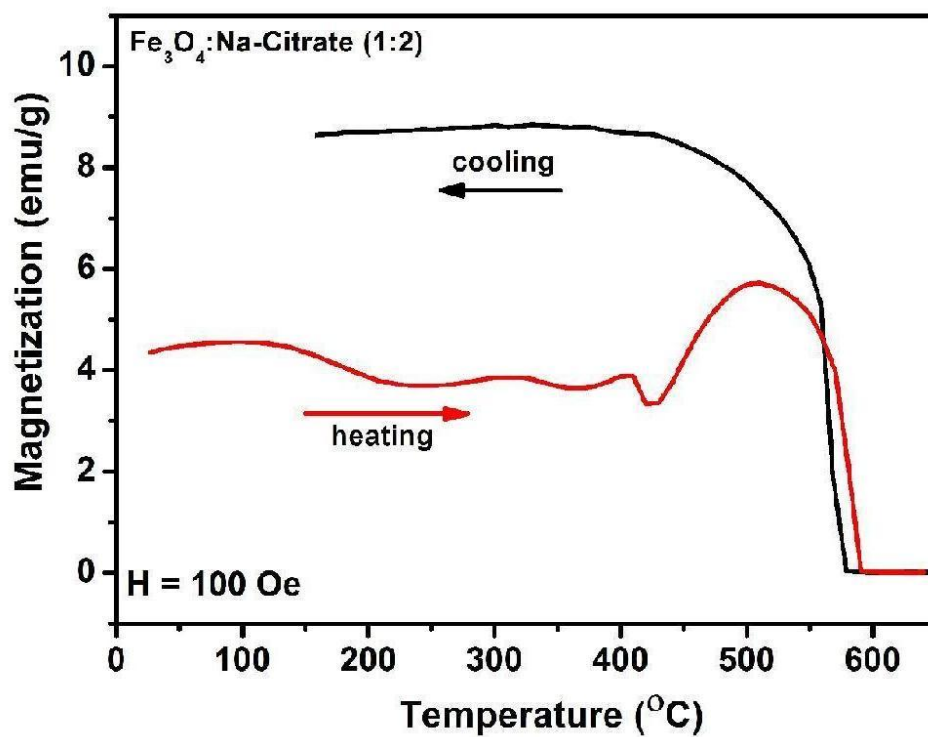

Fig S2 M-T loop of  $\text{Fe}_3\text{O}_4:\text{Na-citrate (1:2)}$ .

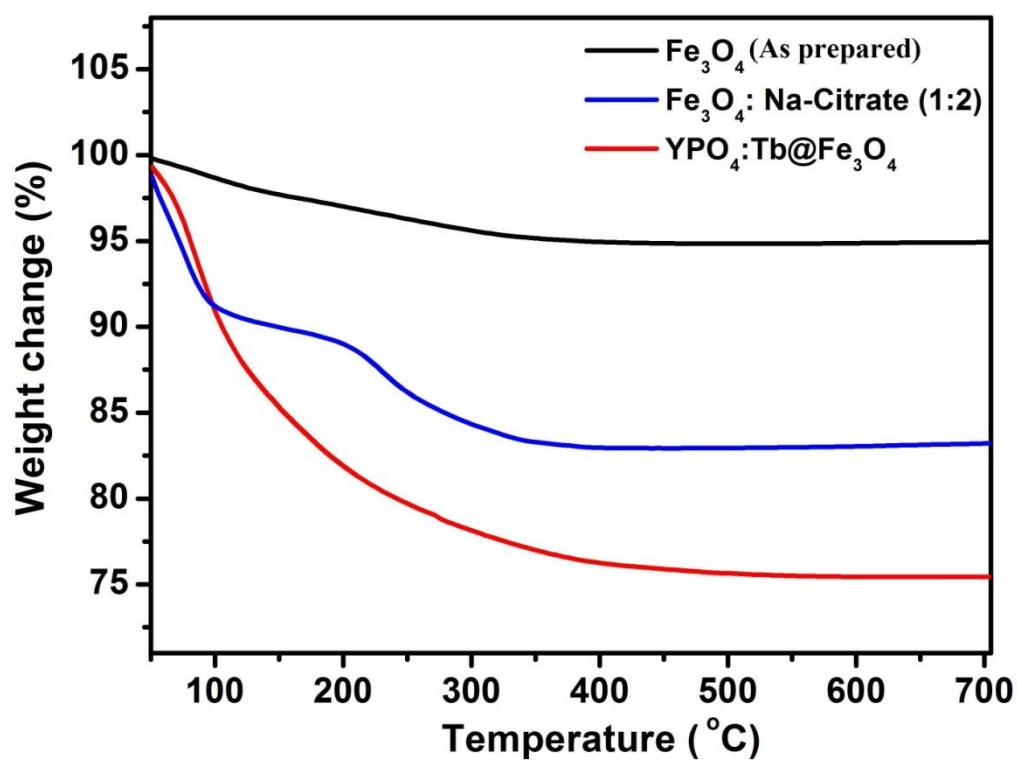

**Fig S3** TGA curve of  $\text{Fe}_3\text{O}_4$ ,  $\text{Fe}_3\text{O}_4$ :Na-citrate and hybrid material,  $\text{YPO}_4\text{:Tb}^{3+}\text{@Fe}_3\text{O}_4$ .

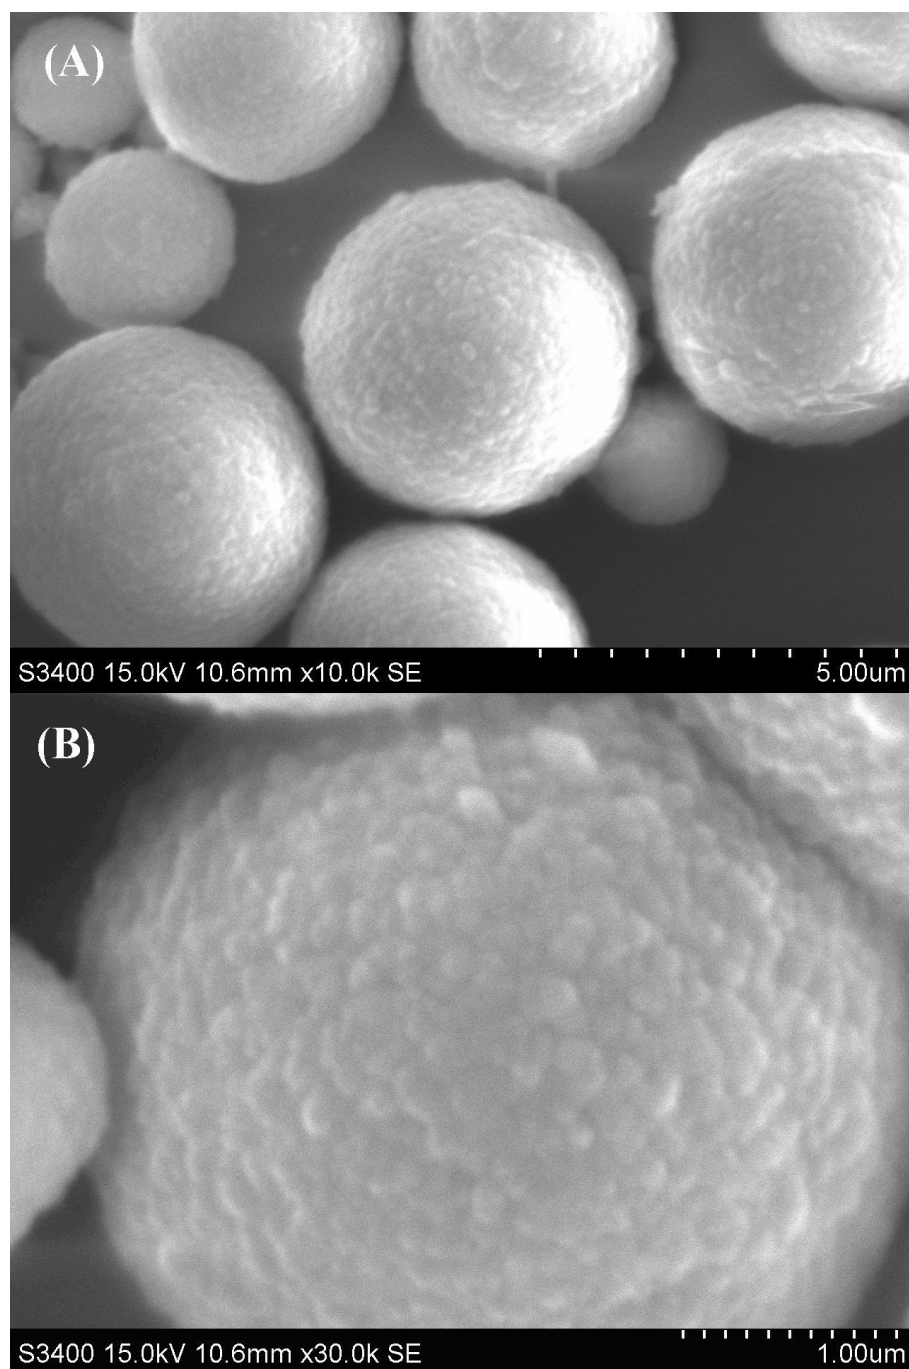

**Fig S4** SEM images of  $\text{YPO}_4\text{:Tb}^{3+}\text{@Fe}_3\text{O}_4$  in presence of dendrimer (a) lower and (b) higher magnification.

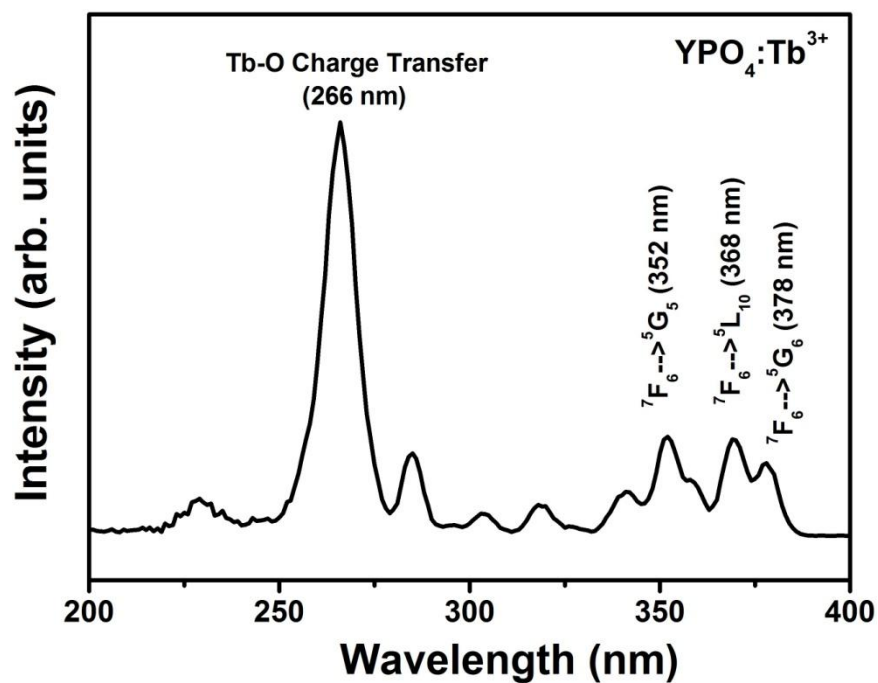

**Fig. S5** Excitation spectra of the YPO<sub>4</sub>:Tb<sup>3+</sup> when monitored at emission wavelength of 545 nm.

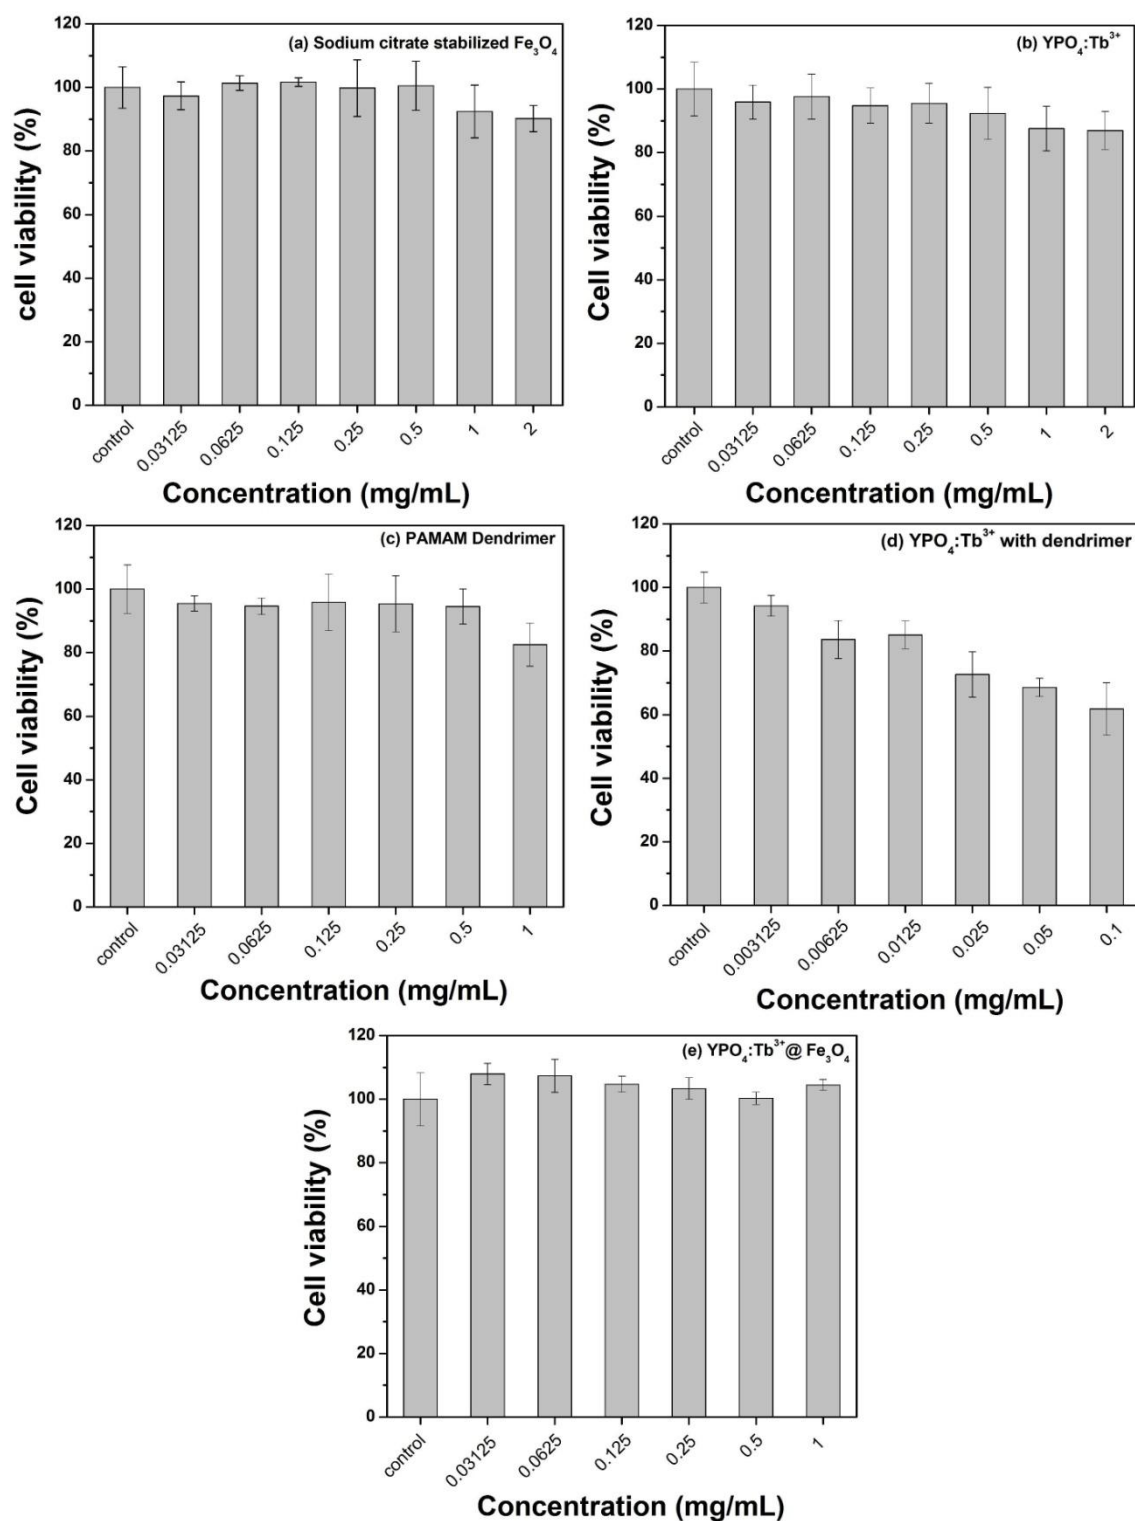

**Fig. S6** Viabilities of HeLa cells incubated with (a) sodium citrate stabilized  $\text{Fe}_3\text{O}_4$ , (b)  $\text{YPO}_4:\text{Tb}^{3+}$ , (c) PAMAM dendrimer, (d)  $\text{YPO}_4:\text{Tb}^{3+}$  with dendrimer and (e) nanohybrid  $\text{YPO}_4:\text{Tb}^{3+}@\text{Fe}_3\text{O}_4$ .
